# Supplementary material for: The Correlation and Mediating Effects Between Self-Efficacy and Quality of Life in Patients with Cardiovascular Diseases: A Systematic Review and Meta-Analysis
Source: Research Square preprint supplement (doi:10.21203/rs.3.rs-8293510/v1), 2026-02-09
Supplement: Supplementary file 1 [file 5a5f1c19a74f6ae3572945ad.docx]

**Supplementary Table 1 Search Strategy for Each Database**

| **Database** | **search strategy** |
| --- | --- |
| **Embase** | #1 'cardiovascular disease'/exp OR 'cardiovascular disease':ti,ab,kw OR 'coronary heart disease':  ti,ab,kw OR 'heart failure':ti,ab,kw  #2 'self efficacy'/exp OR 'self-efficacy':ti,ab,kw OR 'self efficacy':ti,ab,kw  #3 'quality of life'/exp OR 'quality of life':ti,ab,kw OR 'health-related quality of life':ti,ab,kw  #4 'correlation':ti,ab,kw OR 'association':ti,ab,kw OR 'mediating effect':ti,ab,kw OR 'mediation':  ti,ab,kw  #5 #1 AND #2 AND #3 AND #4 |
| **CINAHL** | #1 (MH "Cardiovascular Diseases") OR TI "Cardiovascular Disease" OR AB "Cardiovascular Disease" OR TI "CHD" OR AB "CHD" OR TI "Heart Failure" OR AB "Heart Failure"  #2 (MH "Self Efficacy") OR TI "Self-Efficacy" OR AB "Self-Efficacy" OR TI "Self Efficacy" OR AB "Self Efficacy"  #3 (MH "Quality of Life") OR TI "Quality of Life" OR AB "Quality of Life" OR TI "HRQoL" OR AB "HRQoL"  #4 TI "Correlation" OR AB "Correlation" OR TI "Association" OR AB "Association" OR TI "Mediating Effect" OR AB "Mediating Effect"  #5 #1 AND #2 AND #3 AND #4 |
| **Web of science** | #1 TS=("Cardiovascular Disease" OR "Coronary Heart Disease" OR "Heart Failure" OR "CVD")  #2 TS=("Self-Efficacy" OR "Self Efficacy" OR "Self-Efficacy Beliefs")  #3 TS=("Quality of Life" OR "Health-Related Quality of Life" OR "HRQoL")  #4 TS=("Correlation" OR "Association" OR "Mediating Effect" OR "Mediation")  #5 #1 AND #2 AND #3 AND #4 |
| **Pubmed** | #1 ("Cardiovascular Diseases"[MeSH] OR "Cardiovascular Disease"[Title/Abstract] OR "Coronary Heart Disease"[Title/Abstract] OR "Heart Failure"[Title/Abstract] OR "CVD"[Title/Abstract])  #2 ("Self Efficacy"[MeSH] OR "Self-Efficacy"[Title/Abstract] OR "Self Efficacy"[Title/Abstract]  OR "Self-Efficacy Beliefs"[Title/Abstract])  #3 ("Quality of Life"[MeSH] OR "Quality of Life"[Title/Abstract] OR "Health-Related Quality of Life"[Title/Abstract] OR "HRQoL"[Title/Abstract])  #4 ("Correlation"[Title/Abstract] OR "Association"[Title/Abstract] OR "Relationship"[Title/  Abstract] OR "Mediating Effect"[Title/Abstract] OR "Mediation"[Title/Abstract])  #5 #1 AND #2 AND #3 AND #4 |
| **Cochrane** | #1 [mh "Cardiovascular Diseases"] OR ("Cardiovascular Disease" OR "Coronary Heart Disease" OR "Heart Failure"):ti,ab,kw  #2 [mh "Self Efficacy"] OR ("Self-Efficacy" OR "Self Efficacy"):ti,ab,kw  #3 [mh "Quality of Life"] OR ("Quality of Life" OR "HRQoL"):ti,ab,kw  #4 ("Correlation" OR "Association" OR "Mediating Effect"):ti,ab,kw  #5 #1 AND #2 AND #3 AND #4 |
| **VIP** | #1 主题=(“心血管疾病” OR “冠心病” OR “心力衰竭”)  #2 主题=(“自我效能” OR “自我效能感”)  #3 主题=(“生活质量” OR “生命质量”)  #4 主题=(“相关性” OR “中介效应” OR “中介作用”)  #5 #1 AND #2 AND #3 AND #4 |
| **Wanfang Data** | #1 主题:(“心血管疾病” OR “冠心病” OR “心力衰竭”)  #2 主题:(“自我效能” OR “自我效能感”)  #3 主题:(“生活质量” OR “生命质量”)  #4 主题:(“相关性” OR “中介效应” OR “中介作用”)  #5 #1 AND #2 AND #3 AND #4 |
| **CNKI** | #1 SU=('心血管疾病' OR '冠心病' OR '心力衰竭')  #2 SU=('自我效能' OR '自我效能感')  #3 SU=('生活质量' OR '生命质量')  #4 SU=('相关性' OR '中介效应' OR '中介作用')  #5 #1 AND #2 AND #3 AND #4 |
| **Sinomed** | #1 主题:("心血管疾病" OR "冠心病" OR "心力衰竭")  #2 主题:("自我效能" OR "自我效能感")  #3 主题:("生活质量" OR "生命质量")  #4 主题:("相关性" OR "中介效应" OR "中介作用")  #5 #1 AND #2 AND #3 AND #4 |

**Supplementary Table 2 Risk of bias assessment for the included studies using the modified Newcastle**

**-Ottawa Scale.**

| **Study-id** | **Selection** | | | | **Comparability** | **Outcome** | | | **total score** |
| --- | --- | --- | --- | --- | --- | --- | --- | --- | --- |
| **Representativen-ess of the samplesa** | **Sample size calculationb** | **Non-respondentsc** | **Use of validated measurement toold** | **Adjustment of confounding factorse** | **Use of validated instruments for outcome measurementf** | **Ascertainment of the outcomeg** | **Statistical testh** |
| Li et al.,2009 |  |  | ★ | ★ |  | ★ | ★ |  | 4 |
| Liu et al.,2019 |  |  | ★ | ★ | ★ | ★ | ★ | ★ | 6 |
| Tang et al., 2024 |  |  | ★ | ★ | ★ | ★ | ★ | ★ | 6 |
| Shen et al., 2019 |  |  | ★ | ★ | ★★ | ★ | ★ | ★ | 7 |
| Mai et al.,2025 |  |  |  | ★ | ★★ | ★ | ★ | ★ | 6 |
| Piao et al.,2023 |  |  | ★ | ★ | ★ | ★ | ★ | ★ | 6 |
| Zhang et al.,2021 |  |  | ★ | ★ | ★ | ★ | ★ | ★ | 6 |
| Lu et al.,2024 |  |  | ★ | ★ | ★ | ★ | ★ | ★ | 6 |
| Du et al.,2022 |  | ★ | ★ | ★ | ★ | ★ | ★ | ★ | 7 |
| Barham et al.,2019 |  | ★ | ★ | ★ | ★★ | ★ | ★ | ★ | 8 |
| Thomson et al.,2018 |  |  |  | ★ | ★ | ★ | ★ | ★ | 5 |
| Steca et al., 2014 |  |  |  | ★ | ★ | ★ | ★ | ★ | 5 |
| Zhang et al.,2023 |  | ★ | ★ | ★ | ★★ | ★ | ★ | ★ | 8 |
| Janjani et al.,2025 |  | ★ | ★ | ★ |  | ★ | ★ | ★ | 6 |
| Won et al.,2022 | ★ |  | ★ | ★ | ★★ | ★ | ★ | ★ | 8 |
| Lee et al.,2017 | ★ | ★ |  | ★ | ★★ | ★ | ★ | ★ | 8 |
| Fuochi & Foà.,2017 | ★ |  |  | ★ |  | ★ | ★ | ★ | 5 |
| Suresh et al.,2017 | ★ |  |  | ★ | ★★ | ★ | ★ | ★ | 7 |
| Nekouei Z et al.,2014 | ★ | ★ |  | ★ | ★★ | ★ | ★ | ★ | 8 |
| Li et al.,2024 |  | ★ | ★ | ★ | ★★ | ★ | ★ | ★ | 8 |
| Greco et al.,2015 |  |  |  | ★ | ★★ |  | ★ | ★ | 5 |
| Baradaranfard et al.,2018 | ★ | ★ |  | ★ | ★★ | ★ | ★ | ★ | 8 |
| Brink et al.,2014 | ★ | ★ | ★ | ★ | ★★ | ★ | ★ |  | 8 |
| Castillo-Mayén et al.,2020 | ★ |  | ★ | ★ | ★★ | ★ | ★ | ★ | 8 |
| Zanatta et al.,2024 | ★ | ★ | ★ | ★ | ★★ | ★ |  | ★ | 8 |
| Milaniak et al., 2014 |  |  | ★ | ★ |  | ★ | ★ | ★ | 5 |

a Random sampling or somewhat representative of the average in the target population (one star), Selected group or no description of the sampling strategy (no star);

b Performed (one star), Not performed (no star);

c Losses ≤20% (one star), Losses >20% or not reported (no star);

d Yes (one star), No (no star);

e Adjusted by one confounding factor (one star), Adjusted by other confounding factors (one star), Did not control confounding factors (no star), (Maximum two stars);

f Yes (one star), No (no star);

g Primary data (one star), Secondary data or not reported (no star);

h Appropriate statistical test and clearly described including confidence intervals or the probability level (one star), Inappropriate, incomplete, or not described statistical test (no star).
